# Supplementary material for: CO2-switchable polymer-hybrid silver nanoparticles and their gas-tunable catalytic activity
Source: Royal Society of Chemistry journal article supplement (doi:10.1039/c7ra09233d), 2017-01-01
Supplement: c7ra09233d1.pdf [file c7ra09233d1.pdf]

## Electronic Supplementary Information (ESI)

---

### CO<sub>2</sub>-switchable Polymer-hybrid Silver Nanoparticles and Their Gas-tunable Catalytic Activity

Zanru Guo,<sup>a\*</sup> Hongjian Gu,<sup>a</sup> Wei Ma,<sup>a</sup> Qiang Chen,<sup>a</sup> Zhanfeng He,<sup>b\*</sup> Jiali Zhang,<sup>a</sup>  
Yongxin Liu,<sup>a</sup> Longzhen Zheng<sup>a</sup> and Yujun Feng<sup>c\*</sup>

<sup>a</sup>Department of Polymer Materials and Chemical Engineering, School of Materials Science and Engineering, East China Jiao tong University, Nanchang, Jiangxi 330013, P. R. China. E-mail addresses: guozanru@ecjtu.edu.cn (Z. Guo)

<sup>b</sup>State Key Laboratory of Oil and Gas Reservoir Geology and Exploitation Southwest Petroleum University, Chengdu 610500, P. R. China. E-mail addresses: he\_zhanfeng2008@126.com (Z He)

<sup>c</sup>Polymer Research Institute, State Key Laboratory of Polymer Materials Engineering, Sichuan University, Chengdu 610065, P. R. China. E-mail addresses: yjfeng@scu.edu.cn (Y. Feng)

### Characterizations

Fig. S1 was the <sup>1</sup>H NMR spectrum of trithioester terminated PDEAMA in CDCl<sub>3</sub>: The signals at 0.9 ppm, 1.00 ppm, 1.2 ppm, 2.15 ppm are attributed to the protons in terminal -CH<sub>2</sub> and -CH<sub>3</sub>, -NCH<sub>2</sub>CH<sub>3</sub>, side group -CH<sub>3</sub>, -CH<sub>2</sub>- of main chain, respectively. 2.5 ppm and 2.6 ppm are the chemical shift of the protons in CH<sub>3</sub>CH<sub>2</sub>N- and -OCH<sub>2</sub>CH<sub>2</sub>N-, respectively. 4.0 ppm is the signal of the protons in -OCH<sub>2</sub>CH<sub>2</sub>N-. The characteristic signals of the polymer were assigned, indicating that the PDEAMA-CTA was obtained successfully.

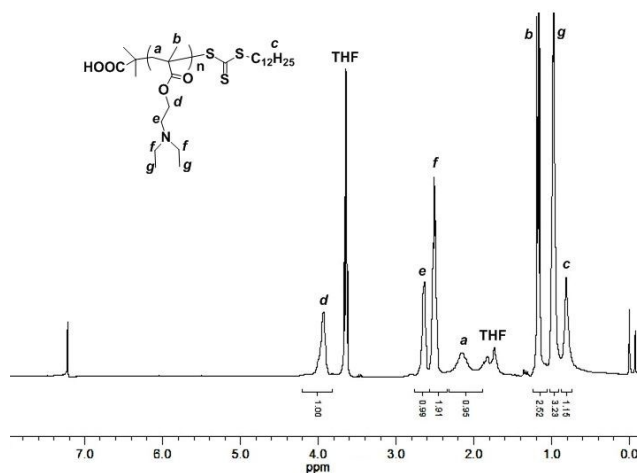

**Fig. S1**  $^1\text{H}$  NMR spectrum of PDEAEMA in  $\text{CDCl}_3$ .

Fig. S2 is the GPC chromatogram for PDEAEMA. The average number molecule weight ( $M_n$ ) and polydispersity index (PDI,  $M_w/M_n$ ) is  $9,250 \text{ g mol}^{-1}$  and 1.25, respectively.

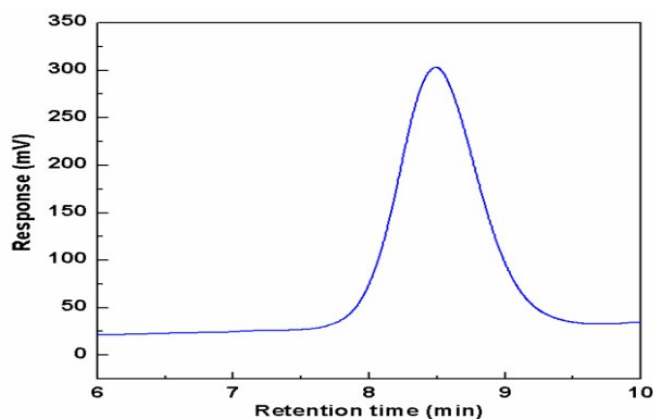

**Fig. S2** GPC spectrum of PDEAEMA

Fig.S3 shows XRD pattern of Ag-NPs shows characteristic diffraction peaks for metallic silver [111], [200], [220] and [311] facets, indicative of the formation of pure Ag.

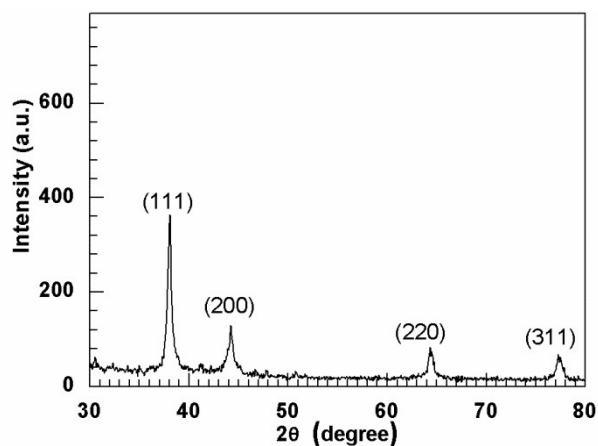

Fig. S3 XRD pattern of Ag-P1

Fig. S4 is the FT-IR spectra of the nanoparticles and the PDEAEMA.

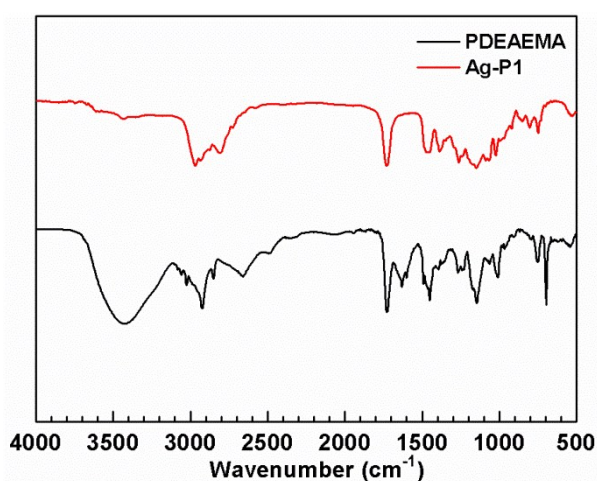

Fig. S4 IR spectrum of Ag-P1 and PDEAEMA (KBr pellet method).

Fig. S5 is the UV-vis spectra of Ag-P1 measured with the same concentration at different times. There is no obvious difference in the shape, position, and symmetry of the absorption peak during 12 months, indicative of the long-term stability of hybrids.

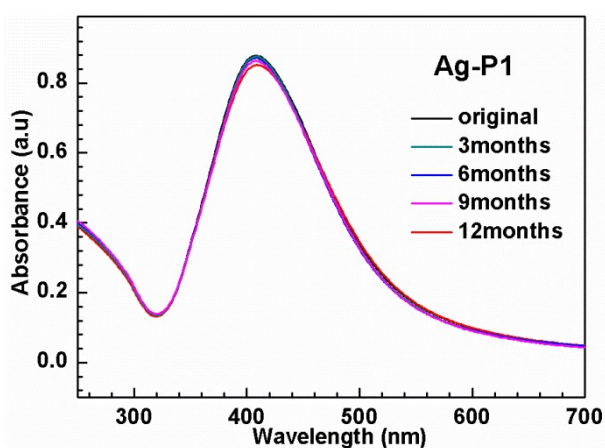

Fig. S5 The stability analysis for Ag-P1 ( $0.1\text{mg}\cdot\text{mL}^{-1}$ ) in water after bubbling  $\text{CO}_2$  at  $25^\circ\text{C}$  by UV-

vis spectra.

Fig. S6 is TEM of Ag-P1 in water after bubbling  $N_2$  at  $25^\circ C$ . An obvious aggregation state of the AgNPs hybrids can be observed.

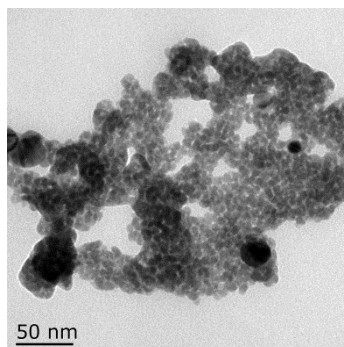

Fig. S6 TEM images of Ag-P1 in water after bubbling  $N_2$  at  $25^\circ C$ .

Fig. S7 shows the time-dependent UV spectra for the reduction of 4-nitrophenol in presence of Ag-P1 hybrids at different  $CO_2$  flow rate.

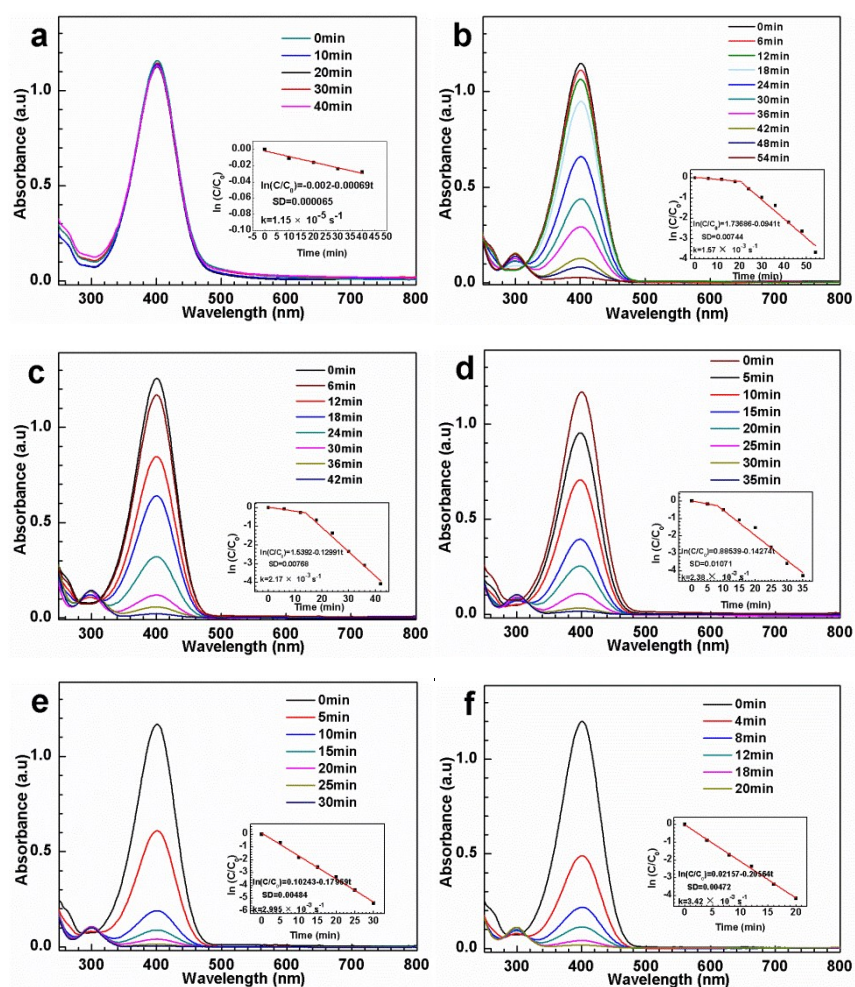

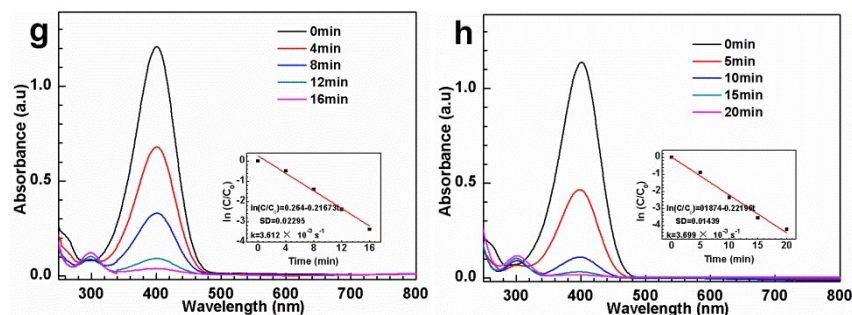

**Fig. S7** Time-dependent UV-vis spectral changes of 4-nitrophenol catalyzed by Ag-P1 with different flow rate of CO<sub>2</sub> bubbling: (a) 0 mL·min<sup>-1</sup>, (b) 10 mL·min<sup>-1</sup>, (c) 15 mL·min<sup>-1</sup>, (d) 20 mL·min<sup>-1</sup>, (e) 25 mL·min<sup>-1</sup>, (f) 30 mL·min<sup>-1</sup>, (g) 40 mL·min<sup>-1</sup> and (h) 50 mL·min<sup>-1</sup>, respectively. The insert images of the plots of  $\ln(C/C_0)$  versus the time  $t$ . The concentrations of 4-NP is 0.0139 mg·mL<sup>-1</sup>, the concentrations of NaBH<sub>4</sub> is 0.38 mg·mL<sup>-1</sup> and the concentrations of Ag-P1 is  $2 \times 10^{-3}$  mg·mL<sup>-1</sup>.

Fig. S8 shows the time-dependent UV spectra for the reduction of 4-nitrophenol without Ag-P1 hybrids by bubbling CO<sub>2</sub>.

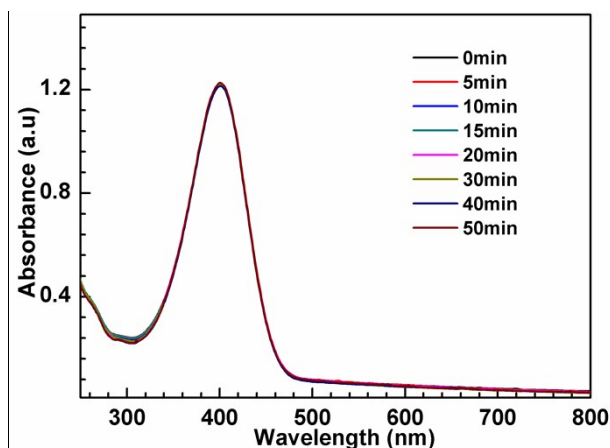

**Fig. S8** The time-dependent UV spectra for the reduction of 4-nitrophenol without Ag-P hybrids by bubbling CO<sub>2</sub>. The flow rate of CO<sub>2</sub> is 30 mL·min<sup>-1</sup>, and the concentrations of 4-NP is 0.0139 mg·mL<sup>-1</sup>.

Fig. S9 shows pH value of the reaction solution at different flow rate of CO<sub>2</sub>.

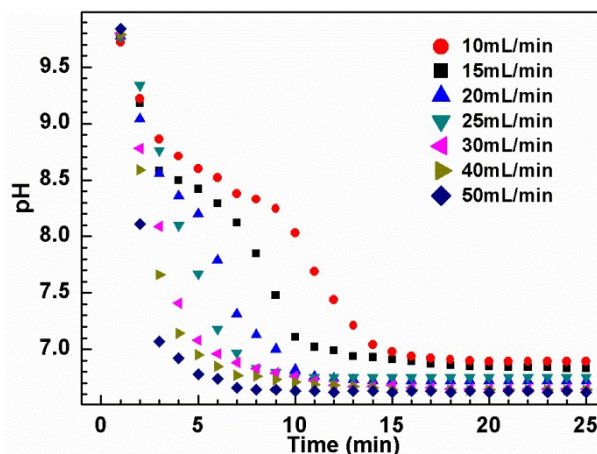

Fig. S9 The pH changes of the reaction solution at different flow rate of CO<sub>2</sub>.

### Calculation of the polymer content onto one nanoparticle

We assume that PDEAEMA-AgNPs hybrids is 1.0 g. Based on the TGA data, the weight of polymer ( $W_{\text{polymer}}$ ) and Ag ( $W_{\text{Ag}}$ ) can be known. Thus the average number of the polymer chains and silver nanoparticles in the hybrids can be calculated by dividing their average molecular weight. Then the average number ( $A$ ) of polymer chains wrapped per silver nanoparticle can be calculated from Equation (1).

$$A = \frac{\frac{W_{\text{polymer}}}{M_{n(\text{polymer})}} \times N_A}{\frac{W_{\text{Ag}}}{M_{\text{Ag}}}} \quad (1)$$

Where  $N_A$  is Avogadro's number,  $M_{n(\text{polymer})}$  is the the molar mass of polymer and it can be obtained in CPC analysis,  $M_{\text{Ag}}$  is the weight of one silver nanoparticles

The density of the silver ( $\rho$ ) is 10.53g·cm<sup>-3</sup>. Thus the weight of one silver nanoparticles can be calculated using Equation (2).

$$M_{\text{Ag}} = \rho \times V \quad (2)$$

Where  $V$  is the volume of one silver nanoparticle. The volume of one silver nanoparticle can be calculated using equation (3).

$$V = \frac{4}{3}\pi\left(\frac{D}{2}\right)^3 \quad (3)$$

Where  $D$  is the diameter of the silver nanoparticle, which be obtained from TEM observation.

## **Electronic Supplementary Information (ESI)**

---

The weight ratio of polymer to silver for Ag-P1, Ag-P2 and Ag-P3 are 90:10, 84:16, 71:29 (w/w %), respectively; and the diameter of Ag-P1, Ag-P2 and Ag-P3 are 8.51 nm, 10.06 nm and 14.16 nm, respectively. So, we calculated that an average number of 2000, 1900 and 2470 polymer chains were coated onto one Ag-P1, Ag-P2 and Ag-P3, respectively.
